# Supplementary material for: Endometrial cancer after endometrial ablation: a systematic review
Source: HighWire-hosted journal article supplement (doi:10.1136/ijgc-2022-003866), 2022-11-14
Supplement: ijgc-2022-003866supp001_data_supplement.pdf [file ijgc-2022-003866supp001_data_supplement.pdf]

**Supplementary file 1. Search Strategy****Search Medline 24-02-2022**

("Endometrial Ablation Techniques"[MeSH Terms] OR ("endometri\*" [Title/Abstract] AND "ablat\*" [Title/Abstract])) AND ("Endometrial Neoplasms"[MeSH Terms] OR "endometrial neoplasm\*" [Title/Abstract] OR "endometrial carcinoma\*" [Title/Abstract] OR "endometrial cancer\*" [Title/Abstract] OR "endometrium cancer\*" [Title/Abstract] OR "endometrial tumor\*" [Title/Abstract] OR "endometrial tumour\*" [Title/Abstract] OR "endometrium tumor\*" [Title/Abstract] OR "endometrial tumour\*" [Title/Abstract] OR "cancer of the endometrium" [Title/Abstract] OR "carcinoma of endometrium" [Title/Abstract] OR "endometrium carcinoma\*" [Title/Abstract] OR "cancer of endometrium\*" [Title/Abstract])

**Embase search 24-02-2022**

('endometrium ablation'/exp OR ((endometri\* AND ablat\*):ti,ab,kw) AND ('endometrium tumor'/exp OR ('endometrium tumor\*' OR 'endometrium tumour\*' OR 'endometrial tumor\*' OR 'endometrial tumour\*' OR 'endometrial neoplasm\*' OR 'endometrial carcinoma\*' OR 'endometrial cancer\*' OR 'endometrium cancer\*' OR 'endometrium carcinoma\*'):ti,ab,kw)

**Cochrane search 24-02-2022**

("Endometrial Ablation Techniques"[MeSH Terms] OR ('endometri\*' AND 'ablat\*')) AND ("Endometrial Neoplasms"[MeSH Terms] OR 'endometrial neoplasm\*' OR 'endometrial carcinoma\*' OR 'endometrial cancer\*' OR 'endometrium cancer\*' OR 'endometrial tumor\*' OR 'endometrial tumour\*' OR 'endometrium tumor\*' OR 'endometrial tumour\*' OR 'cancer of the endometrium' OR 'carcinoma of endometrium' OR 'endometrium carcinoma\*' OR 'cancer of endometrium\*')
